# Supplementary material
Source: PubMed Central journal article supplement (PMC3753658)
Supplement: NIHMS469587-supplement-2.pdf [file NIHMS469587-supplement-2.pdf]

**Supplementary Table 1**

Geboes scale (ref. 13). Classification of histological inflammation from grade 0 to 5, with sub-grades of severity.

**Grade 0 Structural (architectural change)**

## Subgrades

|     |                                                      |
|-----|------------------------------------------------------|
| 0.0 | No abnormality                                       |
| 0.1 | Mild abnormality                                     |
| 0.2 | Mild or moderate diffuse or multifocal abnormalities |
| 0.3 | Severe diffuse or multifocal abnormalities           |

**Grade 1 Chronic inflammatory infiltrate**

## Subgrades

|     |                               |
|-----|-------------------------------|
| 1.0 | No increase                   |
| 1.1 | Mild but unequivocal increase |
| 1.2 | Moderate increase             |
| 1.3 | Marked increase               |

**Grade 2 Lamina propria neutrophils and eosinophils**

## 2A Eosinophils

|       |                               |
|-------|-------------------------------|
| 2A. 0 | No increase                   |
| 2A.1  | Mild but unequivocal increase |
| 2A.2  | Moderate increase             |
| 2A.3  | Marked increase               |

## 2B Neutrophils

|       |                               |
|-------|-------------------------------|
| 2B. 0 | None                          |
| 2B.1  | Mild but unequivocal increase |
| 2B.2  | Moderate increase             |
| 2B.3  | Marked increase               |

**Grade 3 Neutrophils in epithelium**

## 3.0 None

|     |                       |
|-----|-----------------------|
| 3.1 | < 5% crypts involved  |
| 3.2 | < 50% crypts involved |
| 3.3 | > 50% crypts involved |

**Grade 4 Crypt destruction**

|     |                                                       |
|-----|-------------------------------------------------------|
| 4.0 | None                                                  |
| 4.1 | Probable—local excess of neutrophils in part of crypt |
| 4.2 | Probable—marked attenuation                           |
| 4.3 | Unequivocal crypt destruction                         |

**Grade 5 Erosion or ulceration**

|     |                                               |
|-----|-----------------------------------------------|
| 5.0 | No erosion, ulceration, or granulation tissue |
| 5.1 | Recovering epithelium+adjacent inflammation   |
| 5.2 | Probable erosion—focally stripped             |
| 5.3 | Unequivocal erosion                           |
| 5.4 | Ulcer or granulation tissue                   |
