# Supplementary material
Source: PubMed Central journal article supplement (PMC3753658)

**Suppl. 1.**

**A.**

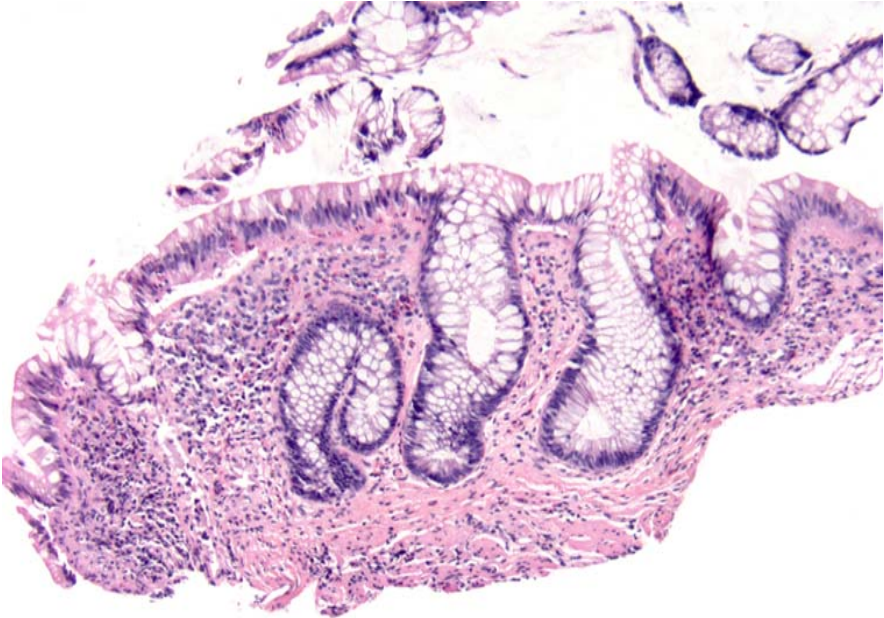

**B.**

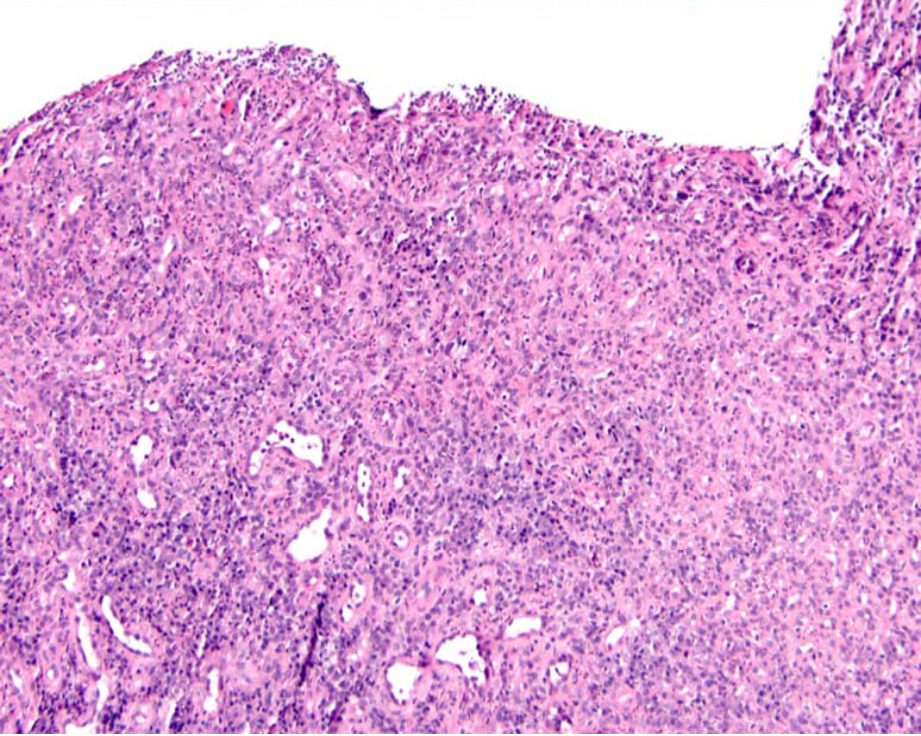

Supplement: NIHMS469587-supplement-1.pdf [file NIHMS469587-supplement-1.pdf]
